# Supplementary material for: Sensitivity enhancement of DHR123 radio-fluorogenic nanoclay gel dosimeter by incorporating surfactants and halogenides
Source: Royal Society of Chemistry journal article supplement (doi:10.1039/d0ra02717k), 2020-01-01
Supplement: d0ra02717k1.pdf [file d0ra02717k1.pdf]

## Appendix: Supplementary data

Sensitivity enhancement of DHR123 radio-fluorogenic nano clay gel  
dosimeter by incorporating surfactants and halogenides.

Anri Mochizuki,<sup>a</sup> Takuya Maeyama,<sup>\*a</sup> Yusuke Watanabe,<sup>b</sup> Shinya Mizukami<sup>b</sup>

- a. Department of Chemistry, School of Science, Kitasato University, 1-15-1  
Kitasato, Minami, Sagamihara, Kanagawa, 252-0373, Japan
- b. School of Allied Health Sciences, Kitasato University, 1-15-1 Kitasato, Minami,  
Sagamihara, Kanagawa, 252-0373, Japan

Normal

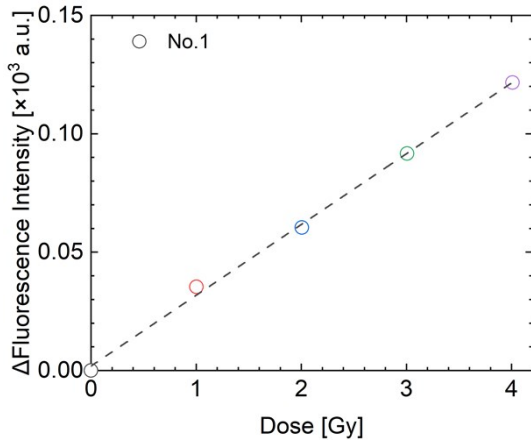

**Figure S1.** Dose dependence of  $\Delta$ fluorescence intensity obtained from 100 $\mu$ M DHR and 2.5 wt% clay. The dashed lines represent linear fitting.

Tx100

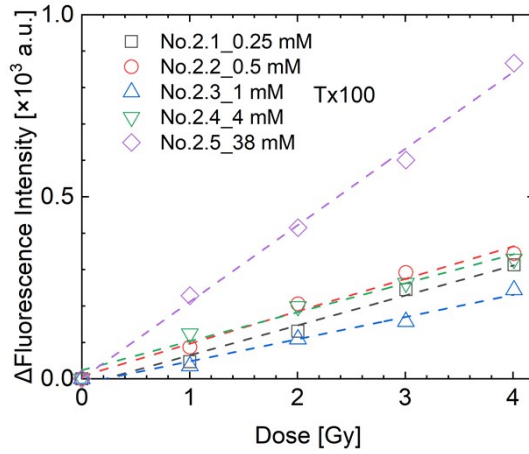

**Figure S2.** Dose dependence of  $\Delta$ fluorescence intensity: influence of Tx100 concentration.

SDS

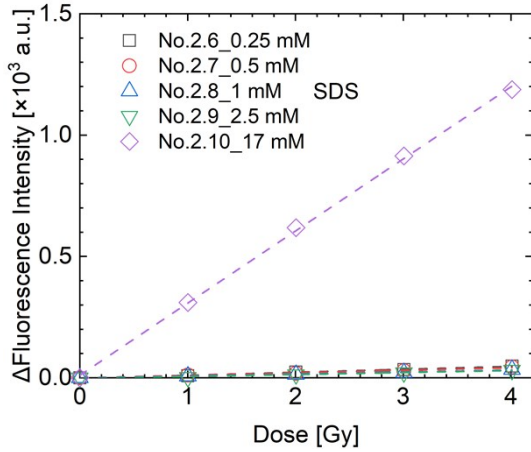

**Figure S3.** Dose dependence of  $\Delta$ fluorescence intensity: influence of SDS concentration.

TCAA

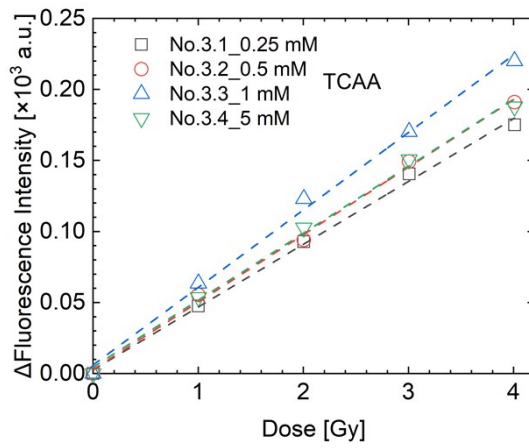

**Figure S4.** Dose dependence of  $\Delta$ fluorescence intensity: influence of TCAA concentration.

TBAA

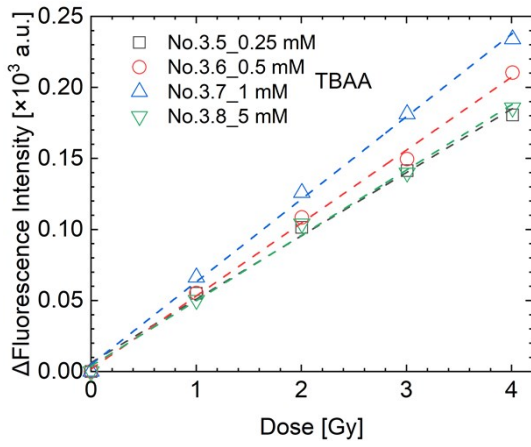

**Figure S5.** Dose dependence of  $\Delta$ fluorescence intensity: influence of TBAA concentration.

TCE

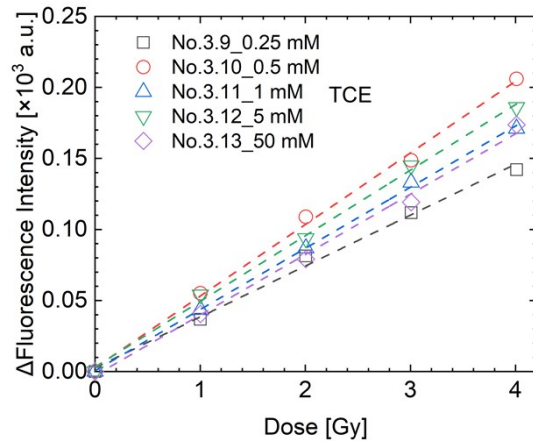

**Figure S6.** Dose dependence of  $\Delta$ fluorescence intensity: influence of TCE concentration.

38 mM Tx100 and TBAA

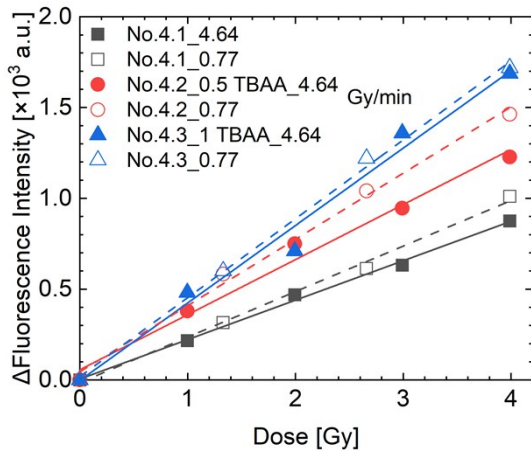

**Figure S7.** Dose dependence of  $\Delta$ fluorescence intensity: influence of TBAA and 38 mM Tx100 concentration.

17 mM SDS and TBAA

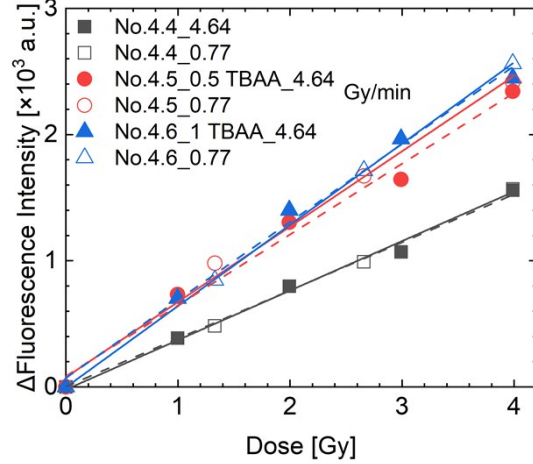

**Figure S8.** Dose dependence of  $\Delta$ fluorescence intensity: influence of TBAA and 17 mM SDS concentration.

The obtained fluorescence spectrum (solid line) and excitation spectrum (dotted line) are shown below. For the base sample, in order to take into account the effect of the increase in fluorescence intensity over time, measurements were taken at the beginning and at the end of the measurement of the set of samples, and the average value was used as the base value.

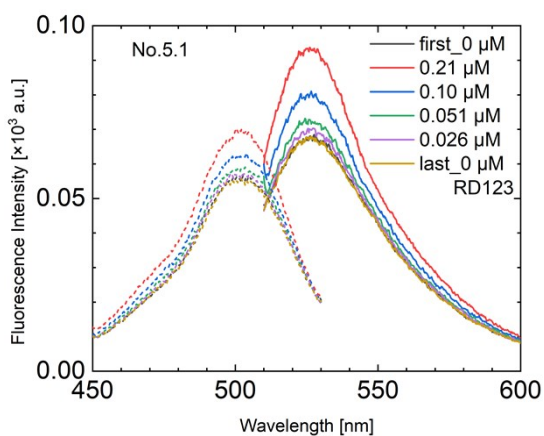

**Figure S9.** Fluorescence properties of 0 – 0.21  $\mu\text{M}$  RD123 in 100  $\mu\text{M}$  DHR123 in 2.5 wt% Clay. Dashed and solid lines show the excitation and fluorescence spectra, respectively.

Calibration curve for normal condition

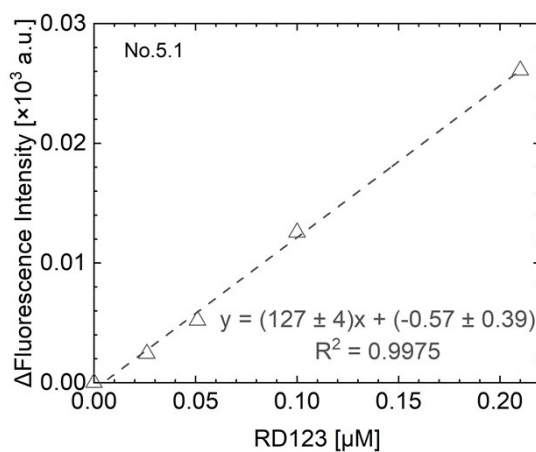

**Figure S10.**  $\Delta$ fluorescence intensity as a function of RD123 concentration. The dashed lines represent linear fitting.

Calibration curve for TBAA addition

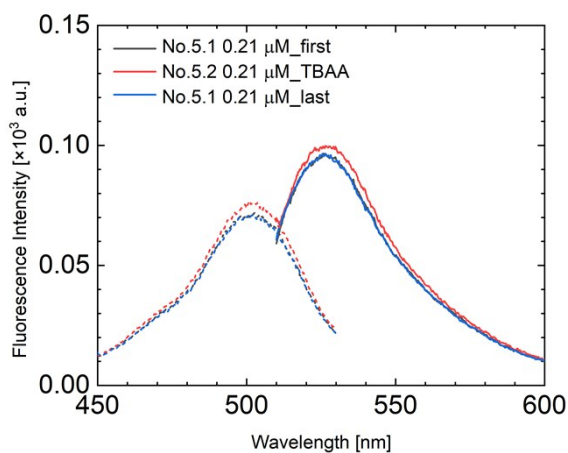

**Figure S11.** Fluorescence properties of 0.21  $\mu\text{M}$  RD123 in 100  $\mu\text{M}$  DHR123 in 2.5 wt% Clay. Dashed and solid lines show the excitation and fluorescence spectra, respectively.

Calibration curve for Tx100 addition

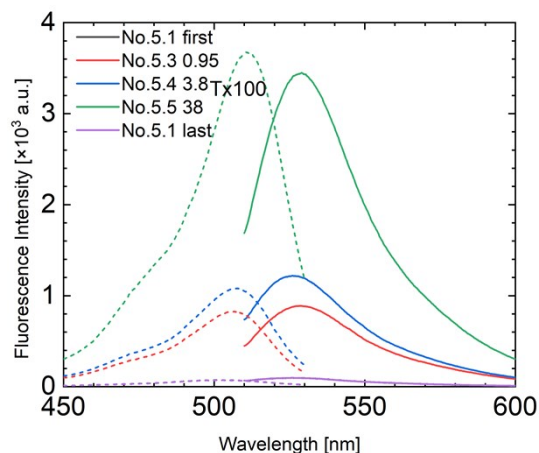

**Figure S12.** Fluorescence properties of 0.21  $\mu\text{M}$  RD123 in 100  $\mu\text{M}$  DHR123 in 2.5 wt% Clay with Tx100. Dashed and solid lines show the excitation and fluorescence spectra, respectively.

Calibration curve for SDS addition

(a)

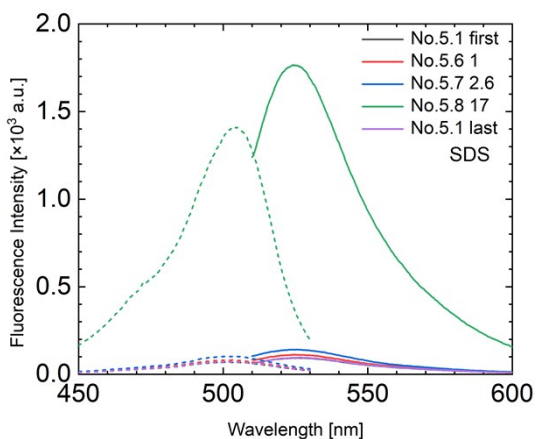

Enlarged view

(b)

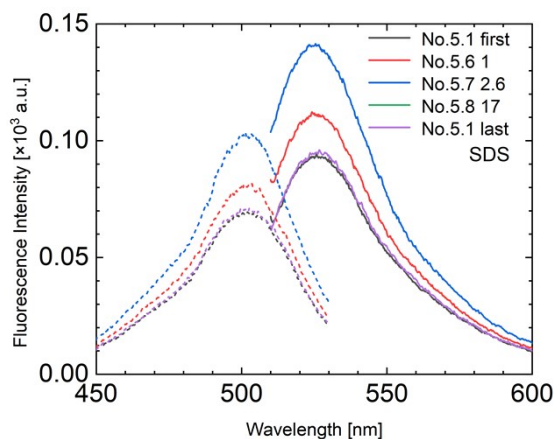

**Figure S13.** (a) Fluorescence properties of 0.21  $\mu\text{M}$  RD123 in 100  $\mu\text{M}$  DHR123 in 2.5 wt% Clay with SDS. Dashed and solid lines show the excitation and fluorescence spectra, respectively. (b) its enlarged view

Table S1. Dose sensitivity and initial fluorescence intensity of samples prepared with several surfactant

| □    | surfactant | Conc. [mM] | Transparency | Initial Fluorescence Intensity | Dose sensitivity |   |      |      | Sensitivity Ratio |      |
|------|------------|------------|--------------|--------------------------------|------------------|---|------|------|-------------------|------|
| 1    |            |            |              |                                | 29.88            | ± | 0.76 | 1    | ±                 | 0.03 |
| 2.1  | Tx100      | 0.25       | clear        | 782.4                          | 82.13            | ± | 6.12 | 2.75 | ±                 | 0.20 |
| 2.2  | Tx100      | 0.5        | clear        | 981.4                          | 89.07            | ± | 6.44 | 2.98 | ±                 | 0.22 |
| 2.3  | Tx100      | 1          | clear        | 1218                           | 60.86            | ± | 4.74 | 2.04 | ±                 | 0.16 |
| 2.4  | Tx100      | 4          | clear        | 1438                           | 79.51            | ± | 6.87 | 2.66 | ±                 | 0.23 |
| 2.5  | Tx100      | 38         | clear        | 3117                           | 210.21           | ± | 7.92 | 7.03 | ±                 | 0.26 |
| 2.6  | SDS        | 0.25       | clear        | 101.8                          | 12.19            | ± | 0.63 | 0.41 | ±                 | 0.02 |
| 2.7  | SDS        | 0.5        | clear        | 101.6                          | 10.54            | ± | 0.77 | 0.35 | ±                 | 0.03 |
| 2.8  | SDS        | 1          | clear        | 112.1                          | 8.25             | ± | 0.73 | 0.28 | ±                 | 0.02 |
| 2.9  | SDS        | 2.5        | clear        | 142.6                          | 8.27             | ± | 0.90 | 0.28 | ±                 | 0.03 |
| 2.10 | SDS        | 17         | clear        | 2616                           | 297.11           | ± | 4.36 | 9.94 | ±                 | 0.15 |
| 2.11 | CTAB       | 0.5        | very turbid  | □                              | □                | □ | □    | □    | □                 | □    |

Table S2. Dose sensitivity and initial fluorescence intensity of samples prepared with several halogenide

| □    | halogenide | Conc. [mM] | Initial Fluorescence Intensity | Dose sensitivity [a.u.] | Sensitivity Ratio |
|------|------------|------------|--------------------------------|-------------------------|-------------------|
| 1    |            |            |                                | 29.88 ± 0.76            | 1.00 ± 0.03       |
| 3.1  | TCAA       | 0.25       | 89.9                           | 44.21 ± 1.37            | 1.48 ± 0.05       |
| 3.2  | TCAA       | 0.5        | 85.15                          | 47.47 ± 1.49            | 1.59 ± 0.05       |
| 3.3  | TCAA       | 1          | 83.33                          | 54.54 ± 2.03            | 1.82 ± 0.07       |
| 3.4  | TCAA       | 5          | 82.82                          | 47.14 ± 1.71            | 1.58 ± 0.06       |
| 3.5  | TBAA       | 0.25       | 88.05                          | 44.61 ± 1.92            | 1.49 ± 0.06       |
| 3.6  | TBAA       | 0.5        | 90.6                           | 51.36 ± 1.55            | 1.72 ± 0.05       |
| 3.7  | TBAA       | 1          | 82.67                          | 58.16 ± 1.54            | 1.95 ± 0.05       |
| 3.8  | TBAA       | 5          | 104.3                          | 45.99 ± 1.74            | 1.54 ± 0.06       |
| 3.9  | TCE        | 0.25       | 102.5                          | 35.84 ± 1.61            | 1.20 ± 0.05       |
| 3.10 | TCE        | 0.5        | 135.2                          | 50.41 ± 1.52            | 1.69 ± 0.05       |
| 3.11 | TCE        | 1          | 124.3                          | 43.06 ± 0.70            | 1.44 ± 0.02       |
| 3.12 | TCE        | 5          | 157.5                          | 46.18 ± 1.29            | 1.55 ± 0.04       |
| 3.13 | TCE        | 50         | 130.5                          | 42.51 ± 1.73            | 1.42 ± 0.06       |

Table S3. Dose sensitivity and initial fluorescence intensity of samples prepared by addition of the both a surfactant and halogenide (Dose rate 4.64 Gy/min)

| No. | Surfactant     | halogenide     | Initial<br>Fluorescence<br>Intensity | Dose sensitivity<br>[a.u.] |   |      | Sensitivity<br>Ratio |   |      |
|-----|----------------|----------------|--------------------------------------|----------------------------|---|------|----------------------|---|------|
| 1   | 0              | 0              | 132.2                                | 38.23                      | ± | 1.78 | 1                    | ± | 0.05 |
| 4.1 | 38 mM<br>Tx100 | 0              | 3280                                 | 217.1                      | ± | 7.15 | 5.68                 | ± | 0.19 |
| 4.2 | 38 mM<br>Tx100 | 0.5 mM<br>TBAA | 3381                                 | 303.2                      | ± | 21.1 | 7.93                 | ± | 0.55 |
| 4.3 | 38 mM<br>Tx100 | 1 mM<br>TBAA   | 3307                                 | 426.4                      | ± | 31.7 | 11.2                 | ± | 0.83 |
| 4.4 | 17 mM<br>SDS   | 0              | 3023                                 | 381.0                      | ± | 16.2 | 9.97                 | ± | 0.42 |
| 4.5 | 17 mM<br>SDS   | 0.5 mM<br>TBAA | 3015                                 | 561.2                      | ± | 36.4 | 14.7                 | ± | 0.95 |
| 4.6 | 17 mM<br>SDS   | 1 mM<br>TBAA   | 2901                                 | 617.7                      | ± | 28.6 | 16.2                 | ± | 0.75 |
